# Supplementary material
Source: PubMed Central journal article supplement (PMC3918934)
Supplement: NIHMS540015-supplement-01.pdf [file NIHMS540015-supplement-01.pdf]

supplementary table 1: variants found by *de novo* sequencing of exons (163 cases, 135 controls)

| Exon   | Position            | SNP         | Classification                |
|--------|---------------------|-------------|-------------------------------|
| exon 4 | 185508830           | ss177930697 | SYNON (462 R154R)             |
| exon 4 | 185508906           | ss177930701 | NONSYNON (538 A180T)          |
| exon 4 | 185509150           | rs12476147  | NONSYNON (782 Q261L)          |
| exon 4 | 185509348           | ss177930705 | NONSYNON (980 N327T)          |
| exon 4 | 185509556           | rs34345078  | SYNON (1188 P396P)            |
| exon 4 | 185509593           | rs62198466  | NONSYNON (1225 I409V)         |
| exon 4 | 185509715           | ss177930708 | SYNON (1347 T449T)            |
| exon 4 | 185509804           | rs35676856  | NON-SYNON (1436 D479G)        |
| exon 4 | 185509842           | rs61739290  | NON-SYNON (1474 I491V)        |
| exon 4 | 185509992           | rs4667001   | NON-SYNON (1624 E542K)        |
| exon 4 | 185510000           | rs4667002   | SYNON (1632 T544T)            |
| exon 4 | 185510001           | rs61739288  | NON-SYNON (1633 G545S)        |
| exon 4 | 185510145           | ss177930711 | NON-SYNON (1777 S593G)        |
| exon 4 | 185510162           | rs728534    | SYNON (1794 K598K)            |
| exon 4 | 185510356           | ss177930715 | NON-SYNON (1988 E663G)        |
| exon 4 | 185510456-185510457 | rs5836928   | 3bp INSERTION IN FRAME -SYNON |
| exon 4 | 185510488           | rs1366842   | NON-SYNON (2120 T707K)        |
| exon 4 | 185510608           | rs12477430  | NON-SYNON (2240 H747R)        |
| exon 4 | 185510969           | ss177930719 | SYNON (2601 R867R)            |
| exon 4 | 185511609           | rs3731834   | NON-SYNON (3241 L1081V)       |
| exon 4 | 185511690           | ss177930722 | NON-SYNON (3322 A1108T)       |

Exon =exon in which variant discovered. Position is given according to NCBI build36.  
 SNP=SNP identifier. Classification= description of SNP and amino acid change. SYNON,  
 synonymous change; NON-SYNON, non-synonymous change

Supplementary Table 2: HapMAP Markers showing nominally significant association with lymphoblastoid *ZNF804A* expression in GeneVar

| SNP              | P-value GenVar | P value fatSNP1       |
|------------------|----------------|-----------------------|
| rs3931790        | 0.006          | $2.77 \times 10^{-5}$ |
| rs7593816        | 0.006          | n/a                   |
| rs1583048        | 0.006          | $2.00 \times 10^{-5}$ |
| rs11030607       | 0.011          | n/a                   |
| rs10188385       | 0.019          | n/a                   |
| rs13424692       | 0.027          | 0.96                  |
| rs263765         | 0.033          | 0.46                  |
| rs16918621       | 0.035          | 0.0062                |
| <b>rs1344706</b> | 0.035          | $5.61 \times 10^{-5}$ |
| rs13420259       | 0.037          | 0.056                 |
| rs17617133       | 0.038          | n/a                   |
| rs7478970        | 0.040          | n/a                   |
| rs1992514        | 0.041          | n/a                   |
| rs13393273       | 0.043          | n/a                   |
| rs12693384       | 0.043          | n/a                   |
| rs435822         | 0.043          | n/a                   |
| rs4146075        | 0.043          | 0.50                  |
| rs10497655       | 0.044          | $1.97 \times 10^{-4}$ |
| rs12693381       | 0.045          | 0.023                 |

Marked in Bold is the most strongly associated SNP from the original GWAS study  
P Value GenVar is the p value for association with expression in that dataset  
P value fatSNP1 is the p value for association in 479 UK Cases and 1445 UK Controls

Supplementary table 3: Association results of genotyping 176 SNPs in fatSNP stage 1.

| SNP        | POS       | ARM-P |
|------------|-----------|-------|
| rs12478223 | 184958599 | 0.72  |
| rs1348341  | 184964668 | 0.93  |
| rs894528   | 184970480 | 0.42  |
| rs1304514  | 184981372 | 0.73  |
| rs4363994  | 184985411 | 0.52  |
| rs1443033  | 184985820 | 0.49  |
| rs10204602 | 184987331 | 0.092 |
| rs10204810 | 184987564 | 0.63  |
| rs10931138 | 184988661 | 0.94  |
| rs2034055  | 184990423 | 0.93  |
| rs12475586 | 184991299 | 0.97  |
| rs6759504  | 184992545 | 0.49  |
| rs6759838  | 184992673 | 0.23  |
| rs6728914  | 184994952 | 0.51  |
| rs12467320 | 184998040 | 0.46  |
| rs17616904 | 185009227 | 0.91  |
| rs13036089 | 185010257 | 0.40  |
| rs13411189 | 185011362 | 0.33  |
| rs12998657 | 185024701 | 0.26  |
| rs12474365 | 185025124 | 0.48  |
| rs1443032  | 185027158 | 0.43  |
| rs12465889 | 185030132 | 0.94  |
| rs11678101 | 185039561 | 0.68  |
| rs17429724 | 185040477 | 0.41  |
| rs16825968 | 185052430 | 0.59  |
| rs4146075  | 185054446 | 0.50  |
| rs10497652 | 185062289 | 0.32  |
| rs1303828  | 185063842 | 0.68  |
| rs12471708 | 185065393 | 0.72  |
| rs12467551 | 185070393 | 0.31  |
| rs1348339  | 185077082 | 0.90  |
| rs17583433 | 185077867 | 0.26  |
| rs1867187  | 185077893 | 0.88  |
| rs17583446 | 185079030 | 0.24  |
| rs17583453 | 185079389 | 0.25  |
| rs17508064 | 185080822 | 0.67  |
| rs7425839  | 185091956 | 0.11  |
| rs4666659  | 185098338 | 0.72  |
| rs1427148  | 185108065 | 0.096 |
| rs12477814 | 185108949 | 0.57  |
| rs17430153 | 185109509 | 0.45  |
| rs2033137  | 185113824 | 0.036 |
| rs6721856  | 185115012 | 0.99  |

|            |           |                       |
|------------|-----------|-----------------------|
| rs17617133 | 185115127 | 0.0062                |
| rs7558116  | 185118807 | 0.93                  |
| rs1593661  | 185118878 | 0.028                 |
| rs6434088  | 185119078 | 0.75                  |
| rs1030430  | 185120343 | 0.0047                |
| rs7566980  | 185122523 | 0.019                 |
| rs2369588  | 185123525 | 0.18                  |
| rs4399684  | 185129145 | 0.32                  |
| rs1896235  | 185129472 | 0.78                  |
| rs10803976 | 185137190 | 0.019                 |
| rs11682677 | 185137384 | 0.29                  |
| rs17430209 | 185141078 | 0.81                  |
| rs12466285 | 185143027 | 0.039                 |
| rs10198713 | 185152750 | 0.053                 |
| rs12618211 | 185153577 | 0.0064                |
| rs1365718  | 185155392 | 0.44                  |
| rs359899   | 185156475 | 0.054                 |
| rs2052794  | 185163995 | 0.35                  |
| rs17508485 | 185167219 | 0.0061                |
| rs11888068 | 185168539 | 3.77x10 <sup>-4</sup> |
| rs13026173 | 185169086 | 0.092                 |
| rs10497655 | 185170285 | 1.90x10 <sup>-4</sup> |
| rs10203158 | 185175081 | 0.025                 |
| rs12693381 | 185175153 | 0.023                 |
| rs12693382 | 185175905 | 0.041                 |
| rs12693383 | 185177107 | 0.027                 |
| rs722384   | 185184253 | 0.27                  |
| rs10202700 | 185187587 | 0.080                 |
| rs17508595 | 185191352 | 0.18                  |
| rs11900132 | 185192056 | 0.31                  |
| rs12613195 | 185197465 | 1.90x10 <sup>-4</sup> |
| rs17508671 | 185200091 | 0.88                  |
| rs17430621 | 185200713 | 0.88                  |
| rs12990519 | 185206213 | 0.48                  |
| rs1480478  | 185213800 | 0.023                 |
| rs1021043  | 185215665 | 0.024                 |
| rs12469299 | 185221740 | 0.042                 |
| rs6434096  | 185224968 | 0.016                 |
| rs17508706 | 185232835 | 0.86                  |
| rs899846   | 185234247 | 0.091                 |
| rs7597593  | 185241824 | 3.94x10 <sup>-4</sup> |
| rs6742182  | 185243865 | 0.094                 |
| rs17508767 | 185244051 | 0.0047                |
| rs1480481  | 185255706 | 0.0026                |
| rs12693387 | 185256270 | 0.30                  |
| rs10173509 | 185261504 | 0.0081                |
| rs10186035 | 185270665 | 0.63                  |

|             |           |                       |
|-------------|-----------|-----------------------|
| rs2199883   | 185273707 | 0.024                 |
| rs17430980  | 185287202 | 0.47                  |
| rs2170202   | 185307812 | 0.29                  |
| rs13026742  | 185313226 | 0.0064                |
| rs13417466  | 185326355 | 0.023                 |
| rs17617913  | 185347119 | 0.036                 |
| rs6716235   | 185363336 | 0.013                 |
| rs6751335   | 185377371 | 0.46                  |
| rs17584522  | 185389974 | 2.69x10 <sup>-5</sup> |
| rs4544394   | 185397915 | 0.44                  |
| rs12693396  | 185427418 | 0.019                 |
| rs13398732  | 185438831 | 0.42                  |
| rs17509608  | 185440822 | 0.92                  |
| rs7588907   | 185443843 | 0.011                 |
| rs7564941   | 185444057 | 0.013                 |
| rs11904676  | 185458964 | 0.0077                |
| rs12693400  | 185466656 | 0.0096                |
| rs3931790   | 185471620 | 2.77x10 <sup>-5</sup> |
| rs7562384   | 185471689 | 0.41                  |
| rs7590852   | 185475156 | 0.62                  |
| rs17431742  | 185481645 | 0.0096                |
| rs725617    | 185486506 | 0.75                  |
| rs1344706   | 185486672 | 5.61x10 <sup>-5</sup> |
| rs13009002  | 185486846 | 0.52                  |
| rs1583048   | 185491385 | 2.00x10 <sup>-5</sup> |
| rs1366839   | 185491910 | 0.32                  |
| rs1583049   | 185501062 | 0.19                  |
| rs6726421   | 185505086 | 0.012                 |
| rs17509873  | 185505652 | 0.0012                |
| rs12476147  | 185509149 | 0.012                 |
| ss177930705 | 185509348 | 0.077                 |
| rs34345078  | 185509555 | 0.67                  |
| rs62198466  | 185509593 | 0.97                  |
| ss177930708 | 185509715 | 0.14                  |
| rs35676856  | 185509803 | 0.0052                |
| rs61739290  | 185509841 | 0.0050                |
| rs4667001   | 185509991 | 0.015                 |
| rs4667002   | 185509999 | 0.26                  |
| rs61739288  | 185510000 | 0.0014                |
| rs728534    | 185510161 | 0.30                  |
| rs1366842   | 185510487 | 0.012                 |
| rs12477430  | 185510607 | 0.26                  |
| rs3731834   | 185511608 | 0.074                 |
| rs6745533   | 185515268 | 0.058                 |
| rs12693402  | 185516323 | 0.011                 |
| rs4380187   | 185520184 | 4.15x10 <sup>-4</sup> |
| rs1429428   | 185530947 | 0.22                  |

|            |           |                       |
|------------|-----------|-----------------------|
| rs6434107  | 185531710 | 0.069                 |
| rs6712373  | 185543939 | 0.17                  |
| rs6741522  | 185544142 | 0.37                  |
| rs4667003  | 185544351 | 0.98                  |
| rs12999356 | 185556696 | 0.45                  |
| rs6714752  | 185560807 | 0.017                 |
| rs2163065  | 185561599 | 0.069                 |
| rs12053131 | 185565199 | 0.53                  |
| rs6761601  | 185570496 | 0.013                 |
| rs12477914 | 185573984 | 0.011                 |
| rs17510170 | 185584889 | 0.072                 |
| rs263765   | 185613275 | 0.46                  |
| rs10167276 | 185613507 | 0.011                 |
| rs1429421  | 185623464 | 0.063                 |
| rs263771   | 185629936 | 0.86                  |
| rs17438478 | 185634329 | 0.23                  |
| rs17584976 | 185634529 | $5.83 \times 10^{-4}$ |
| rs1429426  | 185635166 | 0.0036                |
| rs965472   | 185638903 | 0.15                  |
| rs6752032  | 185640500 | 0.31                  |
| rs263767   | 185640559 | 0.53                  |
| rs13420259 | 185642192 | 0.056                 |
| rs17584997 | 185643649 | 0.024                 |
| rs1483247  | 185645284 | 0.40                  |
| rs17438527 | 185646187 | 0.011                 |
| rs13424692 | 185646982 | 0.96                  |
| rs10165431 | 185651727 | 0.54                  |
| rs17438590 | 185656545 | 0.98                  |
| rs2128737  | 185671827 | 0.50                  |
| rs10211053 | 185672589 | 0.041                 |
| rs1483253  | 185678486 | 0.64                  |
| rs12987273 | 185690221 | 0.61                  |
| rs10931160 | 185691427 | 0.019                 |
| rs13392265 | 185703127 | 0.017                 |
| rs1483233  | 185704248 | 0.43                  |
| rs17438805 | 185714826 | 0.027                 |
| rs6742605  | 185715835 | 0.032                 |
| rs4017483  | 185715865 | 0.030                 |
| rs1483238  | 185719812 | 0.035                 |

POS = position as NCBI b26. ARM =  
Armitage Trend Test P value for  
association

supplementary table 4: Sample statistics

| GWAS plus extra              | rs12613195            | rs17584522            | rs1344706             | rs1583048             | rs6726421 | rs12476147* | ss177930705 | rs61739290 | rs3731834 |
|------------------------------|-----------------------|-----------------------|-----------------------|-----------------------|-----------|-------------|-------------|------------|-----------|
| Call rate (CASE n = 642)     | 98                    | 99                    | 99                    | 97                    | 99        | 92          | 99          | 99         | 100       |
| Call rate (CONTROL n = 2873) | 100                   | 99                    | 100                   | 99                    | 100       | 98          | 99          | 99         | 99        |
| HW CASE (P)                  | 0.92                  | 0.14                  | 0.59                  | 0.17                  | 0.52      | 0.92        | 0.18        | 0.61       | 1.00      |
| HW CONTROL (P)               | 0.80                  | 1.00                  | 0.82                  | 1.00                  | 0.82      | 0.94        | 0.76        | 0.66       | 0.70      |
| Arm trend (P)                | 1.20X10 <sup>-5</sup> | 6.21X10 <sup>-7</sup> | 7.08X10 <sup>-7</sup> | 7.40X10 <sup>-6</sup> | 0.0022    | 0.0055      | 0.49        | 0.017      | 0.0080    |
| OR                           | 1.35                  | 1.48                  | 1.38                  | 1.46                  | 1.21      | 1.23        | 1.13        | 1.31       | 1.26      |

\* the extra cases were not genotyped for this SNP

| Bulgarian                   | rs12613195 | rs17584522 | rs1344706 | rs1583048 | rs6726421 | rs12476147 | ss177930705 | rs61739290 | rs3731834 |
|-----------------------------|------------|------------|-----------|-----------|-----------|------------|-------------|------------|-----------|
| Call rate (CASE n = 611)    | 97         | 97         | 97        | 99        | 100       | 99         | 99          | 99         | 100       |
| Call rate (CONTROL n = 661) | 98         | 99         | 98        | 99        | 100       | 100        | 100         | 100        | 100       |
| HW CASE (P)                 | 0.07       | 0.66       | 0.80      | 1.00      | 0.51      | 0.38       | 1.00        | 1.00       | 0.90      |
| HW CONTROL (P)              | 0.76       | 0.25       | 1.00      | 0.17      | 0.52      | 0.56       | 0.42        | 1.00       | 0.78      |
| Arm trend (P)               | 0.73       | 0.22       | 0.70      | 0.48      | 1.00      | 0.25       | 0.99        | 0.24       | 0.14      |
| OR                          | 1.03       | 1.14       | 1.03      | 1.08      | 1.00      | 0.91       | 1.00        | 0.83       | 1.17      |

| Munich                       | rs12613195 | rs17584522 | rs1344706 | rs1583048 | rs6726421 | rs12476147 | ss177930705 | rs61739290 | rs3731834 |
|------------------------------|------------|------------|-----------|-----------|-----------|------------|-------------|------------|-----------|
| Call rate (CASE n = 759)     | 96         | 98         | 99        | 99        | 98        | 99         | 99          | 99         | 100       |
| Call rate (CONTROL n = 1897) | 98         | 99         | 98        | 99        | 99        | 99         | 99          | 99         | 100       |
| HW CASE (P)                  | 0.53       | 0.16       | 0.82      | 0.48      | 0.26      | 0.44       | 1.00        | 0.18       | 1.00      |
| HW CONTROL (P)               | 0.52       | 0.17       | 0.70      | 0.15      | 0.19      | 0.27       | 1.00        | 0.62       | 1.00      |
| Arm trend (P)                | 0.084      | 0.44       | 0.042     | 0.53      | 0.10      | 0.15       | 0.55        | 0.80       | 0.45      |
| OR                           | 1.12       | 1.06       | 1.14      | 1.05      | 1.11      | 1.10       | 1.12        | 0.97       | 1.06      |

| Dublin                      | rs12613195 | rs17584522 | rs1344706 | rs1583048 | rs6726421 | rs12476147            | ss177930705 | rs61739290 | rs3731834 |
|-----------------------------|------------|------------|-----------|-----------|-----------|-----------------------|-------------|------------|-----------|
| Call rate (CASE n = 295)    | 97         | 95         | 93        | 99        | 99        | 99                    | 99          | 99         | 100       |
| Call rate (CONTROL n = 983) | 98         | 93         | 97        | 97        | 99        | 98                    | 98          | 98         | 99        |
| HW CASE (P)                 | 0.05       | 0.06       | 0.49      | 1.00      | 0.24      | 0.35                  | 1.00        | 0.72       | 0.63      |
| HW CONTROL (P)              | 0.71       | 0.69       | 0.94      | 1.00      | 0.56      | 0.68                  | 1.00        | 0.77       | 0.41      |
| Arm trend (P)               | 0.43       | 0.66       | 0.12      | 0.30      | 0.0018    | 5.47X10 <sup>-5</sup> | 0.32        | 0.0078     | 0.20      |
| OR                          | 1.09       | 1.05       | 1.17      | 1.14      | 1.34      | 1.48                  | 0.76        | 1.58       | 1.19      |

HW = Hardy-Weinberg P-value. ARM = Armitage trend P-value. OR = Odds ratio



supplementary table 5: Meta analysis of rs1344706 in schizophrenia samples

|                              | OR   | CI_low | CI_up | p-value                | Ncas         | Ncon         |
|------------------------------|------|--------|-------|------------------------|--------------|--------------|
| Cardiff                      | 1.38 | 1.22   | 1.57  | $7.02 \times 10^{-7}$  | 636          | 2936         |
| Dublin 1                     | 1.17 | 0.96   | 1.44  | 0.12                   | 275          | 951          |
| Bulgarian                    | 0.97 | 0.82   | 1.14  | 0.70                   | 593          | 651          |
| Munich                       | 1.14 | 1      | 1.28  | 0.041                  | 751          | 1857         |
| MGS EA                       | 1.09 | 1      | 1.18  | 0.038                  | 2666         | 2633         |
| Bonn                         | 1.05 | 0.91   | 1.2   | 0.52                   | 735          | 1022         |
| Israel                       | 1.07 | 0.94   | 1.21  | 0.33                   | 732          | 1497         |
| China                        | 1.06 | 0.94   | 1.2   | 0.33                   | 996          | 1015         |
| Japan                        | 1.1  | 0.96   | 1.27  | 0.18                   | 721          | 796          |
| Portugal                     | 0.95 | 0.74   | 1.21  | 0.66                   | 346          | 216          |
| Sweden 1                     | 1.32 | 0.97   | 1.79  | 0.075                  | 170          | 170          |
| Sweden 2                     | 1.09 | 0.86   | 1.38  | 0.50                   | 389          | 230          |
| Sweden 3                     | 1.12 | 0.96   | 1.3   | 0.14                   | 538          | 904          |
| Aberdeen                     | 1.05 | 0.9    | 1.22  | 0.55                   | 718          | 700          |
| Edinburgh                    | 1.06 | 0.84   | 1.32  | 0.63                   | 365          | 284          |
| London                       | 1.16 | 0.97   | 1.39  | 0.096                  | 522          | 503          |
| VCU-Ireland                  | 1.2  | 1.03   | 1.4   | 0.019                  | 984          | 554          |
| Pittsburgh                   | 1.11 | 0.93   | 1.34  | 0.25                   | 471          | 531          |
| ZHH                          | 1.3  | 1.01   | 1.68  | 0.038                  | 277          | 247          |
| Dublin 2                     | 1.13 | 0.87   | 1.48  | 0.36                   | 351          | 165          |
| SGENE-plus                   | 1.07 | 0.98   | 1.17  | 0.11                   | 1630         | 15443        |
| SGENE-plus (follow up)       | 1.08 | 1.01   | 1.16  | 0.033                  | 2797         | 4407         |
| MGS AA                       | 1.06 | 0.85   | 1.3   | 0.62                   | 1282         | 963          |
| <b>TOTAL</b>                 | 1.1  | 1.07   | 1.14  | $2.54 \times 10^{-11}$ | <b>18945</b> | <b>38675</b> |
| p-value (heterogen)=0.353    |      |        |       |                        |              |              |
| <b>TOTAL without Cardiff</b> | 1.09 | 1.06   | 1.13  | $1.19 \times 10^{-8}$  | <b>18309</b> | <b>35739</b> |
| p-value (heterogen)=0.957    |      |        |       |                        |              |              |

Meta analysis of rs1344706 in schizophrenia and Bipolar samples

|               | OR   | CI_low | CI_up | p-value               | Ncas | Ncon |
|---------------|------|--------|-------|-----------------------|------|------|
| Cardiff (PSY) | 1.22 | 1.12   | 1.31  | $1.21 \times 10^{-6}$ | 2368 | 2936 |
| Dublin 1      | 1.17 | 0.96   | 1.44  | 0.12                  | 275  | 951  |
| Bulgarian     | 0.97 | 0.82   | 1.14  | 0.70                  | 593  | 651  |
| Munich        | 1.14 | 1      | 1.28  | 0.041                 | 751  | 1857 |
| MGS EA        | 1.09 | 1      | 1.18  | 0.038                 | 2666 | 2633 |
| Bonn          | 1.05 | 0.91   | 1.2   | 0.52                  | 735  | 1022 |
| Israel        | 1.07 | 0.94   | 1.21  | 0.33                  | 732  | 1497 |
| China         | 1.06 | 0.94   | 1.2   | 0.33                  | 996  | 1015 |
| Japan         | 1.1  | 0.96   | 1.27  | 0.18                  | 721  | 796  |

|                              |      |      |      |                              |              |              |
|------------------------------|------|------|------|------------------------------|--------------|--------------|
| Portugal                     | 0.95 | 0.74 | 1.21 | 0.66                         | 346          | 216          |
| Sweden 1                     | 1.32 | 0.97 | 1.79 | 0.075                        | 170          | 170          |
| Sweden 2                     | 1.09 | 0.86 | 1.38 | 0.50                         | 389          | 230          |
| Sweden 3                     | 1.12 | 0.96 | 1.3  | 0.14                         | 538          | 904          |
| Aberdeen                     | 1.05 | 0.9  | 1.22 | 0.55                         | 718          | 700          |
| Edinburgh                    | 1.06 | 0.84 | 1.32 | 0.63                         | 365          | 284          |
| London                       | 1.16 | 0.97 | 1.39 | 0.096                        | 522          | 503          |
| VCU-Ireland                  | 1.2  | 1.03 | 1.4  | 0.019                        | 984          | 554          |
| Pittsburgh                   | 1.11 | 0.93 | 1.34 | 0.25                         | 471          | 531          |
| ZHH                          | 1.3  | 1.01 | 1.68 | 0.038                        | 277          | 247          |
| Dublin 2                     | 1.13 | 0.87 | 1.48 | 0.36                         | 351          | 165          |
| SGENE-plus (PSY)             | 1.09 | 1.01 | 1.18 | 0.037                        | 2033         | 15443        |
| SGENE-plus (PSY) (follow up) | 1.08 | 1.01 | 1.16 | 0.02                         | 2991         | 4407         |
| MGS AA                       | 1.06 | 0.85 | 1.3  | 0.62                         | 1282         | 963          |
| <b>TOTAL</b>                 |      |      |      |                              |              |              |
| p-value (heterogen)= 0.740   | 1.11 | 1.07 | 1.14 | <b>4.10x10<sup>-13</sup></b> | <b>21274</b> | <b>38675</b> |
| <b>TOTAL without Cardiff</b> |      |      |      |                              |              |              |
| p-value (heterogen)= 0.961   | 1.09 | 1.06 | 1.13 | <b>2.80x10<sup>-9</sup></b>  | <b>18906</b> | <b>35739</b> |

OR = Odds ratio. CI = 95% Confidence Interval. p-value = Meta analysis P-value. Ncas = number of cases. Ncon = number of controls.





supplementary table 6: Sensitivity analysis for meta analyses

| Excluded study:  | SZ   |        |       |          |       |       |      | SZ+PSY |        |       |          |       |       |      |
|------------------|------|--------|-------|----------|-------|-------|------|--------|--------|-------|----------|-------|-------|------|
|                  | OR   | CI_low | CI_up | p-value  | Ncas  | Ncon  | het  | OR     | CI_low | CI_up | p-value  | Ncas  | Ncon  | het  |
| Cardiff          | 1.09 | 1.06   | 1.13  | 1.19E-08 | 18309 | 35739 | 0.96 | 1.09   | 1.06   | 1.13  | 2.80E-09 | 18906 | 35739 | 0.96 |
| Dublin 1         | 1.10 | 1.07   | 1.14  | 7.23E-11 | 18670 | 37724 | 0.32 | 1.10   | 1.07   | 1.14  | 1.20E-12 | 20999 | 37724 | 0.71 |
| Bulgarian        | 1.11 | 1.07   | 1.14  | 7.50E-12 | 18352 | 38024 | 0.44 | 1.11   | 1.08   | 1.15  | 1.20E-13 | 20681 | 38024 | 0.84 |
| Munich 1         | 1.10 | 1.07   | 1.14  | 1.88E-10 | 18194 | 36818 | 0.31 | 1.10   | 1.07   | 1.14  | 3.10E-12 | 20523 | 36818 | 0.70 |
| MGS EA           | 1.11 | 1.07   | 1.14  | 2.15E-10 | 16279 | 36042 | 0.30 | 1.11   | 1.07   | 1.14  | 3.40E-12 | 18608 | 36042 | 0.70 |
| Bonn             | 1.11 | 1.07   | 1.14  | 2.31E-11 | 18210 | 37653 | 0.33 | 1.11   | 1.08   | 1.14  | 3.60E-13 | 20539 | 37653 | 0.73 |
| Israel           | 1.10 | 1.07   | 1.14  | 3.64E-11 | 18213 | 37178 | 0.31 | 1.11   | 1.07   | 1.14  | 5.80E-13 | 20542 | 37178 | 0.71 |
| China            | 1.11 | 1.07   | 1.14  | 3.46E-11 | 17949 | 37660 | 0.32 | 1.11   | 1.08   | 1.14  | 5.50E-13 | 20278 | 37660 | 0.71 |
| Japan            | 1.10 | 1.07   | 1.14  | 6.33E-11 | 18224 | 37879 | 0.28 | 1.11   | 1.07   | 1.14  | 1.00E-12 | 20553 | 37879 | 0.69 |
| Portugal         | 1.11 | 1.07   | 1.14  | 1.31E-11 | 18599 | 38459 | 0.38 | 1.11   | 1.08   | 1.14  | 2.10E-13 | 20928 | 38459 | 0.78 |
| Sweden 1         | 1.10 | 1.07   | 1.14  | 6.48E-11 | 18775 | 38505 | 0.37 | 1.10   | 1.07   | 1.14  | 1.10E-12 | 21104 | 38505 | 0.76 |
| Sweden 2         | 1.10 | 1.07   | 1.14  | 3.20E-11 | 18556 | 38445 | 0.30 | 1.11   | 1.07   | 1.14  | 5.20E-13 | 20885 | 38445 | 0.69 |
| Sweden 3         | 1.10 | 1.07   | 1.14  | 7.56E-11 | 18407 | 37771 | 0.30 | 1.11   | 1.07   | 1.14  | 1.20E-12 | 20736 | 37771 | 0.69 |
| Aberdeen         | 1.10 | 1.07   | 1.14  | 2.43E-11 | 18227 | 37975 | 0.32 | 1.11   | 1.08   | 1.14  | 3.90E-13 | 20556 | 37975 | 0.72 |
| Edinburgh        | 1.10 | 1.07   | 1.14  | 2.67E-11 | 18580 | 38391 | 0.31 | 1.11   | 1.07   | 1.14  | 4.30E-13 | 20909 | 38391 | 0.70 |
| London           | 1.10 | 1.07   | 1.14  | 8.72E-11 | 18423 | 38172 | 0.32 | 1.10   | 1.07   | 1.14  | 1.40E-12 | 20752 | 38172 | 0.71 |
| VCU-Ireland      | 1.10 | 1.07   | 1.14  | 2.27E-10 | 17961 | 38121 | 0.36 | 1.10   | 1.07   | 1.14  | 3.80E-12 | 20290 | 38121 | 0.76 |
| Pittsburgh       | 1.10 | 1.07   | 1.14  | 4.93E-11 | 18474 | 38144 | 0.30 | 1.11   | 1.07   | 1.14  | 8.00E-13 | 20803 | 38144 | 0.69 |
| ZHH              | 1.10 | 1.07   | 1.14  | 9.39E-11 | 18668 | 38428 | 0.39 | 1.10   | 1.07   | 1.14  | 1.60E-12 | 20997 | 38428 | 0.79 |
| Dublin 2         | 1.10 | 1.07   | 1.14  | 3.81E-11 | 18594 | 38510 | 0.30 | 1.11   | 1.07   | 1.14  | 6.20E-13 | 20923 | 38510 | 0.69 |
| SGENE+           | 1.11 | 1.07   | 1.14  | 7.83E-11 | 17315 | 23232 | 0.32 | 1.11   | 1.07   | 1.15  | 3.40E-12 | 19241 | 23232 | 0.70 |
| SGENE+ follow up | 1.11 | 1.07   | 1.15  | 2.06E-10 | 16148 | 34268 | 0.32 | 1.11   | 1.07   | 1.15  | 5.30E-12 | 18283 | 34268 | 0.71 |
| MGS AA           | 1.10 | 1.07   | 1.14  | 2.65E-11 | 17663 | 37712 | 0.31 | 1.11   | 1.07   | 1.14  | 4.30E-13 | 19992 | 37712 | 0.70 |

OR = Odds ratio. CI = 95% Confidence Interval. p-value = Meta analysis P-value. Ncas = number of cases. Ncon = number of controls. het = heterogeneity P-value

supplementary table 7: within study and meta analyses of most significant ZNF804A SNPs chosen for follow up

| SNP ID                    | Allele | Cardiff Full |                       | Bulgarian |                  | Munich 1 |                  | Dublin 1 |                       | fatSNP2 |                       | ISC <sup>l</sup> |                | SGENE plus |                | MGS -EA    |                | MGS -AA    |                | meta Sz |                       |
|---------------------------|--------|--------------|-----------------------|-----------|------------------|----------|------------------|----------|-----------------------|---------|-----------------------|------------------|----------------|------------|----------------|------------|----------------|------------|----------------|---------|-----------------------|
|                           |        | OR           | ARM                   | OR        | ARM <sup>a</sup> | OR       | ARM <sup>a</sup> | OR       | ARM <sup>a</sup>      | OR      | P                     | OR               | P <sup>a</sup> | OR         | P <sup>a</sup> | OR         | P <sup>a</sup> | OR         | P <sup>a</sup> | OR      | P                     |
| rs12613195                | C      | 1.35         | 1.20x10 <sup>-5</sup> | 1.03      | 0.36             | 1.12     | 0.042            | 1.09     | 0.22                  | 1.17    | 6.03x10 <sup>-5</sup> | 1.07             | 0.060          | 1.02       | 0.29           | 1.07       | 0.045          | 0.96       | 0.74           | 1.08    | 1.51x10 <sup>-4</sup> |
| rs17584522 <sup>b</sup>   | C      | 1.48         | 6.21x10 <sup>-7</sup> | 1.14      | 0.11             | 1.06     | 0.22             | 1.05     | 0.33                  | 1.20    | 5.34x10 <sup>-5</sup> | 1.07             | 0.060          | 1.02       | 0.36           | 1.07       | 0.046          | 1.06       | 0.31           | 1.09    | 9.15x10 <sup>-5</sup> |
| rs1344706                 | T      | 1.38         | 6.85x10 <sup>-7</sup> | 0.97      | 0.70             | 1.14     | 0.021            | 1.17     | 0.06                  | 1.18    | 8.31x10 <sup>-6</sup> | 1.08             | 0.030          | 1.07       | 0.054          | 1.09       | 0.019          | 1.06       | 0.31           | 1.11    | 3.65x10 <sup>-7</sup> |
| rs1583048 <sup>c</sup>    | A      | 1.46         | 7.40x10 <sup>-6</sup> | 1.08      | 0.24             | 1.05     | 0.26             | 1.14     | 0.15                  | 1.18    | 2.85x10 <sup>-4</sup> | 1.07             | 0.060          | 1.02       | 0.36           | 1.07       | 0.046          | no proxies | n/a            | 1.09    | 2.44x10 <sup>-4</sup> |
| rs6726421 <sup>d,e</sup>  | C      | 1.21         | 0.0022                | 1.00      | 0.50             | 1.11     | 0.052            | 1.34     | 9.03x10 <sup>-4</sup> | 1.15    | 1.06x10 <sup>-4</sup> | 1.03             | 0.23           | 1.05       | 0.13           | 1.05       | 0.092          | 1.04       | 0.34           | 1.07    | 2.35x10 <sup>-4</sup> |
| rs12476147 <sup>f,g</sup> | A      | 1.23         | 0.0055                | 0.91      | 0.25             | 1.10     | 0.074            | 1.48     | 2.73x10 <sup>-5</sup> | 1.14    | 6.54x10 <sup>-4</sup> | 1.03             | 0.35           | 1.05       | 0.13           | 1.06       | 0.072          | 1.03       | 0.29           | 1.08    | 5.25x10 <sup>-4</sup> |
| ss177930705               | C      | 1.13         | 0.49                  | 1.00      | 0.50             | 1.12     | 0.28             | 0.76     | 0.32                  | 1.04    | 0.74                  | no proxies       | n/a            | no proxies | n/a            | no proxies | n/a            | no proxies | n/a            | n/a     | n/a                   |
| rs61739290 <sup>h</sup>   | G      | 1.31         | 0.017                 | 0.83      | 0.24             | 0.97     | 0.80             | 1.58     | 0.0039                | 1.12    | 0.099                 | 1.03             | 0.34           | 1.04       | 0.28           | 0.99       | 0.91           | no proxies | n/a            | 1.05    | 0.17                  |
| rs3731834                 | C      | 1.26         | 0.0080                | 0.85      | 0.14             | 1.06     | 0.22             | 1.19     | 0.10                  | 1.09    | 0.072                 | no proxies       | n/a            | 1.13       | 0.13           | no proxies | n/a            | no proxies | n/a            | n/a     | n/a                   |

Cardiff Full, Bulgarian, Munich 1 and Dublin 1 = data from O'Donovan et al. 2008. ISC = International Schizophrenia Consortium. SGENE-plus = schizophrenia sample. MGS-EA = Molecular Genetics of Schizophrenia European American sample. MGS-AA = Molecular Genetics of Schizophrenia African American sample. meta Sz = meta analysis of all schizophrenia samples.

OR = Odds ratio. ARM = Armitage trend test P value. CMH = Cochran-Mantel-Haenszel P value. P = meta analysis P-value.

<sup>a</sup>1-tailed, tests where OR are in the same direction as Cardiff Full.

<sup>b</sup> best proxy : in ISC and MGS-EA rs12613195 (r2=0.82), LD calculated in HapMap CEU sample; in SGENE plus rs1583048 (r2=0.76), LD calculated in HapMap CEU sample and in MGS-AA rs1344706 (r2=1), LD calculated in HapMap YRI sample.

<sup>c</sup> best proxy : in ISC and MGS -EA rs12613195 (r2=0.76), LD calculated in HapMap CEU sample

<sup>d</sup> intronic SNP assayed as a proxy for non-synonymous SNP rs4667001

<sup>e</sup> best proxy : in SGENE plus rs1366842 (r2=1), LD calculated in HapMap CEU sample

<sup>f</sup> best proxy : in SGENE plus rs1366842 (r2=1), LD calculated in HapMap CEU sample

<sup>g</sup> UK extra Schizophrenia data unavailable

<sup>h</sup> best proxy : in ISC rs17509873 (r2=1), MGS -EA rs10497657 (r2=1) and in SGENE plus rs10497662 (r2=1), LD calculated in HapMap CEU sample. In MGS-AA sample there were no suitable proxy SNPs

<sup>i</sup> data for Dublin and Bulgaria removed for this analysis





supplementary table 8: SNPs discovered by genomic resequencing

| Putative SNPs                              | Number | Comments                                      |
|--------------------------------------------|--------|-----------------------------------------------|
| Total                                      | 825    |                                               |
| Previously available CEU data*             | 245    |                                               |
| Obtained using Illumina assay              | 172    |                                               |
| Total Obtained                             | 417    |                                               |
|                                            |        |                                               |
| Designed but failed Illumina genotyping QC | 26     |                                               |
| Not designed (repetitive sequence)         | 43     | assuming 15% of 284 putative SNPs are genuine |
| Not designed (unique sequence)             | 98     |                                               |
| Total data not obtained                    | 167    |                                               |
| Total obtained (%)                         | 71     |                                               |

\*previously genotyped by us or in Hapmap

supplementary table 9: SNPs from genomic *de novo* resequencing project passing illumina genotyping QC

| SNP_ID     | Position  | SNP alleles |
|------------|-----------|-------------|
| rs359903   | 185164347 | W           |
| rs359904   | 185164766 | R           |
| novel1851  | 185165142 | R           |
| rs12992164 | 185166033 | Y           |
| rs16826057 | 185166454 | S           |
| rs359893   | 185167845 | R           |
| novel5377  | 185168668 | Y           |
| rs17617285 | 185169381 | R           |
| novel7197  | 185170488 | W           |
| rs430040   | 185178258 | Y           |
| novel16692 | 185179983 | R           |
| rs403115   | 185183824 | Y           |
| novel24339 | 185187630 | R           |
| novel26673 | 185189964 | Y           |
| rs359882   | 185192103 | R           |
| novel33630 | 185196921 | Y           |
| rs359888   | 185200585 | R           |
| novel38549 | 185201840 | K           |
| novel42758 | 185206049 | Y           |
| rs62176172 | 185207727 | Y           |
| rs35068933 | 185207825 | W           |
| rs6434094  | 185208407 | M           |
| rs35431480 | 185208524 | Y           |
| rs2054549  | 185210195 | M           |
| rs33993208 | 185211862 | R           |
| novel49759 | 185213050 | M           |
| rs7564347  | 185213625 | W           |
| novel51682 | 185214973 | W           |
| rs11890128 | 185215122 | K           |
| rs35230759 | 185215194 | R           |
| novel52323 | 185215614 | W           |
| rs62176207 | 185216516 | R           |
| novel53705 | 185216996 | M           |
| novel54888 | 185218179 | M           |
| novel55234 | 185218525 | R           |
| rs34934597 | 185219822 | R           |
| novel56907 | 185220198 | K           |
| novel64599 | 185227890 | M           |
| novel65254 | 185228545 | K           |

|             |           |   |
|-------------|-----------|---|
| novel66020  | 185229311 | Y |
| novel68412  | 185231703 | Y |
| rs35979599  | 185232113 | Y |
| rs899845    | 185234233 | Y |
| novel71226  | 185234517 | R |
| rs60170726  | 185235750 | R |
| rs1480479   | 185237174 | Y |
| novel74877  | 185238168 | Y |
| novel77803  | 185241094 | Y |
| novel78927  | 185242218 | W |
| novel83108  | 185246399 | R |
| novel83551  | 185246842 | Y |
| novel85338  | 185248629 | Y |
| novel90142  | 185253433 | R |
| rs6718759   | 185258349 | W |
| rs55782979  | 185258686 | Y |
| novel96986  | 185260277 | Y |
| novel97931  | 185261222 | R |
| rs16826169  | 185274322 | S |
| novel111103 | 185274394 | R |
| rs17430890  | 185274788 | K |
| novel111983 | 185275274 | Y |
| rs34494944  | 185278136 | Y |
| novel116751 | 185280042 | R |
| novel123941 | 185287232 | Y |
| novel124046 | 185287337 | Y |
| novel127290 | 185290581 | K |
| rs62176233  | 185291226 | Y |
| novel128458 | 185291749 | Y |
| rs17430987  | 185295739 | R |
| rs11278998  | 185297447 | W |
| rs7569699   | 185297642 | R |
| rs34202603  | 185300396 | R |
| novel141994 | 185305285 | W |
| novel144000 | 185307291 | R |
| novel145756 | 185309047 | S |
| rs13023106  | 185309748 | R |
| novel149846 | 185313137 | R |
| rs13001215  | 185313646 | W |
| novel150425 | 185313716 | Y |
| rs62176236  | 185315663 | Y |
| rs34481141  | 185316002 | R |
| rs1480484   | 185317755 | Y |
| rs1480485   | 185318000 | K |

|             |           |   |
|-------------|-----------|---|
| novel154825 | 185318116 | W |
| rs62176237  | 185318314 | R |
| novel158082 | 185321373 | Y |
| novel162760 | 185326051 | Y |
| novel164453 | 185327744 | W |
| rs12992805  | 185332883 | Y |
| novel170233 | 185333524 | W |
| novel172211 | 185335502 | S |
| rs13396662  | 185336244 | K |
| novel174978 | 185338269 | Y |
| rs10177035  | 185341291 | Y |
| novel179195 | 185342486 | R |
| rs10194285  | 185342919 | R |
| rs62176239  | 185344812 | Y |
| novel182118 | 185345409 | W |
| novel186114 | 185349405 | M |
| novel192429 | 185355720 | M |
| novel193621 | 185356912 | Y |
| novel195622 | 185358913 | Y |
| novel196675 | 185359966 | Y |
| rs34327168  | 185364330 | R |
| rs34963004  | 185364611 | Y |
| rs34452663  | 185365165 | R |
| novel208545 | 185371836 | Y |
| novel213549 | 185376840 | K |
| novel218168 | 185381459 | Y |
| novel218344 | 185381635 | M |
| rs62174661  | 185396199 | S |
| rs35105890  | 185397031 | R |
| rs62174663  | 185409015 | Y |
| novel250662 | 185413953 | Y |
| novel251156 | 185414447 | R |
| novel255033 | 185418324 | K |
| novel258120 | 185421411 | S |
| novel258258 | 185421549 | S |
| novel261464 | 185424755 | K |
| rs6709440   | 185425736 | R |
| novel263985 | 185427276 | R |
| rs6748925   | 185427931 | W |
| novel266110 | 185429401 | W |
| rs1579465   | 185429742 | R |
| rs35321501  | 185429937 | Y |
| rs7577581   | 185431724 | K |
| rs12693398  | 185432695 | R |

|             |           |   |
|-------------|-----------|---|
| rs13422256  | 185433333 | Y |
| novel271092 | 185434383 | R |
| rs62200788  | 185436090 | M |
| novel281946 | 185445237 | R |
| novel286992 | 185450283 | R |
| rs4586602   | 185451039 | Y |
| novel287859 | 185451150 | Y |
| novel290149 | 185453440 | W |
| rs34945978  | 185454114 | W |
| novel292986 | 185456277 | M |
| rs56310614  | 185460205 | Y |
| novel298508 | 185461799 | S |
| novel308084 | 185471375 | W |
| novel314084 | 185477375 | Y |
| novel314256 | 185477547 | R |
| novel315421 | 185478712 | Y |
| novel315805 | 185479096 | Y |
| novel318197 | 185481488 | R |
| novel319867 | 185483158 | Y |
| novel320993 | 185484284 | Y |
| novel322837 | 185486128 | M |
| novel323110 | 185486401 | K |
| novel323726 | 185487017 | Y |
| rs4666998   | 185488466 | S |
| novel326151 | 185489442 | R |
| novel328282 | 185491573 | Y |
| novel343720 | 185507011 | K |
| novel347499 | 185510790 | M |
| rs10931158  | 185517810 | Y |
| novel356554 | 185519845 | Y |
| novel356785 | 185520076 | R |
| novel368304 | 185531595 | M |
| novel369549 | 185532840 | M |
| novel369768 | 185533059 | Y |
| novel371359 | 185534650 | Y |
| novel371478 | 185534769 | M |
| novel371703 | 185534994 | M |
| novel372423 | 185535714 | R |
| novel372590 | 185535881 | W |
| novel373189 | 185536480 | Y |
| novel373389 | 185536680 | R |
| novel373626 | 185536917 | K |
| novel373794 | 185537085 | R |
| novel379138 | 185542429 | M |

|           |           |   |
|-----------|-----------|---|
| rs7583540 | 185542640 | Y |
|-----------|-----------|---|

SNP\_ID = either db SNP rs# where available or novel# when discovered by us alone. Position = NCBI b36. SNP alleles = standard IUB code nomenclature

supplementary table 10: markers untagged at  $r^2=1$  MAF $\geq$ 0.01 in fatSNP1 sample, their Imputed P-value and pairwise LD correlation to rs1344706

| SNP         | PLINK |         | Beagle         |       | D'   | r <sup>2</sup> |
|-------------|-------|---------|----------------|-------|------|----------------|
|             | INFO  | P       | R <sup>2</sup> | P     |      |                |
| novel266110 | 0.10  | n/a     | n/a            | n/a   | 1    | 0.02           |
| novel319867 | 0.13  | n/a     | n/a            | n/a   | 1    | 0.03           |
| novel158082 | 0.43  | n/a     | n/a            | n/a   | 1    | 0.03           |
| rs10497658  | 0.46  | n/a     | n/a            | n/a   | 1    | 0.02           |
| rs13018902  | 0.46  | n/a     | n/a            | n/a   | 1    | 0.02           |
| rs17430890  | 0.49  | n/a     | n/a            | n/a   | 1    | 0.02           |
| novel263985 | 0.50  | n/a     | 0.51           | n/a   | 1    | 0.02           |
| rs17430987  | 0.60  | n/a     | 0.96           | 0.063 | 1    | 0.03           |
| novel149846 | 0.61  | n/a     | 0.88           | n/a   | 0.52 | 0.01           |
| novel154825 | 0.61  | n/a     | 0.82           | n/a   | 1    | 0.13           |
| rs73041379  | 0.62  | n/a     | 0.75           | n/a   | 0.07 | 0              |
| rs9646741   | 0.63  | n/a     | n/a            | n/a   | 1    | 0.01           |
| novel379138 | 0.64  | n/a     | 0.05           | n/a   | 0.72 | 0.04           |
| novel77803  | 0.70  | n/a     | 0.64           | n/a   | 1    | 0.12           |
| novel65254  | 0.73  | n/a     | 0.89           | n/a   | 1    | 0.1            |
| novel111983 | 0.74  | n/a     | 0.83           | n/a   | 1    | 0.12           |
| novel164453 | 0.74  | n/a     | 0.83           | n/a   | 1    | 0.12           |
| novel74877  | 0.77  | n/a     | n/a            | n/a   | 1    | 0.03           |
| rs1021041   | 0.77  | n/a     | 0.72           | n/a   | 0.34 | 0.02           |
| rs415350    | 0.78  | n/a     | 0.96           | 0.44  | 1    | 0.01           |
| ss177930722 | 0.78  | n/a     | 0.15           | n/a   | 0.23 | 0              |
| rs2033138   | 0.81  | 0.76    | 0.91           | 0.94  | 0.37 | 0.06           |
| novel1851   | 0.81  | 0.34    | 0.87           | n/a   | 0.22 | 0.01           |
| rs1365714   | 0.81  | 0.16    | 0.95           | 0.18  | 0.17 | 0.02           |
| rs2279266   | 0.81  | 0.011   | 0.76           | n/a   | 1    | 0.05           |
| rs359901    | 0.82  | 0.62    | 0.62           | n/a   | 1    | 0.03           |
| rs13430946  | 0.89  | 0.67    | 0.81           | n/a   | 0.79 | 0.07           |
| rs359878    | 0.90  | 0.18    | 0.98           | 0.35  | 0.38 | 0.05           |
| rs1429423   | 0.91  | 0.91    | 0.98           | 1.00  | 1    | 0.2            |
| rs6748925   | 0.92  | 0.00078 | 0.88           | n/a   | 1    | 0.07           |
| rs1443029   | 0.92  | 0.91    | 0.96           | 0.70  | 0.07 | 0              |
| rs2053562   | 0.92  | 0.91    | 0.96           | 0.76  | 0.07 | 0              |
| rs17431708  | 0.95  | 0.67    | 0.00           | n/a   | 1    | 0.01           |
| rs4586602   | 0.96  | 0.52    | 0.97           | 0.44  | 1    | 0.16           |
| rs10180958  | 0.96  | 0.40    | 0.91           | 0.47  | 1    | 0.18           |
| rs10931145  | 0.96  | 0.12    | 0.97           | 0.098 | 0.18 | 0.02           |
| rs2369337   | 0.96  | 0.56    | 0.98           | 0.77  | 0.18 | 0.01           |
| rs1579762   | 0.96  | 0.56    | 0.98           | 0.93  | 0.18 | 0.01           |
| rs1596271   | 0.96  | 0.56    | 0.98           | 0.93  | 0.18 | 0.01           |
| rs981091    | 0.96  | 0.56    | 0.99           | 0.93  | 0.18 | 0.01           |
| rs13394337  | 0.97  | 0.0032  | 0.94           | 0.018 | 0.86 | 0.09           |

|             |      |        |      |        |      |      |
|-------------|------|--------|------|--------|------|------|
| rs359895    | 0.97 | 0.016  | 0.98 | 0.022  | 0.41 | 0.15 |
| novel290149 | 0.97 | 0.014  | 0.98 | 0.0086 | 1    | 0.26 |
| novel53705  | 0.98 | 0.16   | 0.97 | 0.31   | 0.2  | 0.01 |
| rs11890128  | 0.98 | 0.16   | 0.97 | 0.25   | 0.2  | 0.01 |
| novel42758  | 0.98 | 0.16   | 0.98 | 0.27   | 0.2  | 0.01 |
| rs11891662  | 0.98 | 0.16   | 0.99 | 0.17   | 0.2  | 0.01 |
| rs9288106   | 0.98 | 0.16   | 0.99 | 0.23   | 0.2  | 0.01 |
| novel64599  | 0.98 | 0.16   | 1.00 | 0.27   | 0.2  | 0.01 |
| rs2054549   | 0.98 | 0.015  | 0.96 | 0.018  | 0.4  | 0.15 |
| rs62176207  | 0.98 | 0.11   | 0.97 | 0.15   | 0.89 | 0.13 |
| rs1483234   | 0.99 | 0.0092 | 0.70 | n/a    | 1    | 0.04 |
| rs2369346   | 1.00 | 0.93   | 0.95 | 0.85   | 0.09 | 0    |
| rs403115    | 1.00 | 0.015  | 1.00 | 0.013  | 0.41 | 0.16 |
| rs35979599  | 1.00 | 0.18   | 1.00 | 0.17   | 0.36 | 0.04 |
| rs10931157  | 1.01 | 0.26   | 0.93 | 0.33   | 0.93 | 0.28 |
| novel144000 | 1.01 | 0.0035 | 0.99 | 0.010  | 0.7  | 0.03 |
| novel170233 | 1.01 | 0.0038 | 0.99 | 0.012  | 0.7  | 0.03 |
| novel141994 | 1.01 | 0.0035 | 0.99 | 0.010  | 0.7  | 0.03 |
| novel150425 | 1.01 | 0.0035 | 0.99 | 0.010  | 0.7  | 0.03 |
| novel162760 | 1.01 | 0.0035 | 0.99 | 0.010  | 0.7  | 0.03 |
| rs34202603  | 1.01 | 0.0035 | 0.99 | 0.010  | 0.7  | 0.03 |
| novel145756 | 1.01 | 0.0035 | 1.00 | 0.010  | 0.7  | 0.03 |
| rs359882    | 1.01 | 0.014  | 1.00 | 0.013  | 0.41 | 0.15 |
| rs6434093   | 1.02 | 1.00   | 0.02 | n/a    | 1    | 0.01 |
| rs10194642  | 1.02 | 0.92   | 0.51 | n/a    | 0.36 | 0.06 |
| rs1427149   | 1.02 | 0.92   | 0.87 | n/a    | 0.36 | 0.06 |
| rs13406273  | 1.02 | 0.28   | 0.88 | n/a    | 0.15 | 0.01 |
| rs17430600  | 1.02 | 0.014  | 1.00 | 0.025  | 0.53 | 0.15 |
| rs6728764   | 1.03 | 0.075  | 1.00 | 0.11   | 1    | 0.38 |
| rs7608194   | 1.03 | 0.015  | 1.00 | 0.021  | 0.58 | 0.17 |
| rs10197925  | 1.03 | 0.015  | 1.00 | 0.023  | 0.58 | 0.17 |
| rs7608284   | 1.03 | 0.015  | 1.00 | 0.025  | 0.58 | 0.17 |
| rs359892    | 1.03 | 0.015  | 1.00 | 0.025  | 0.58 | 0.17 |
| rs430040    | 1.04 | 0.013  | 0.99 | 0.015  | 0.53 | 0.15 |
| rs435822    | 1.04 | 0.013  | 1.00 | 0.014  | 0.53 | 0.15 |
| rs13393273  | 1.04 | 0.013  | 1.00 | 0.019  | 0.53 | 0.15 |
| rs12693384  | 1.04 | 0.013  | 1.00 | 0.019  | 0.53 | 0.15 |
| rs359893    | 1.09 | 0.85   | n/a  | n/a    | 1    | 0.02 |
| novel186114 | 1.14 | 0.37   | 0.09 | n/a    | 1    | 0.02 |

PLINK: INFO = information content metric. P = Imputed P-value, only shown for SNPs that have been accurately imputed (INFO>0.8). Beagle:  $R^2$  = estimated squared correlation between the imputed allele dosage with the highest posterior probability and the true allele dosage, P = Imputed P-value. D' and  $r^2$  = LD metric pairwise with rs1344706







supplemental table 11: all SNPs from within *ZNF804A* study region with pairwise  $r^2 > 0.2$  with rs1344706

| SNP         | D' | r2   | P (PLINK) | P (Beagle) |
|-------------|----|------|-----------|------------|
| rs1429423   | 1  | 0.2  | 0.91      | 1.00       |
| rs263771    | 1  | 0.21 | 0.81      | 0.86       |
| rs4667002   | 1  | 0.22 | 0.78      | 0.22       |
| rs7590852   | 1  | 0.21 | 0.73      | 0.64       |
| rs4666994   | 1  | 0.21 | 0.72      | 0.83       |
| rs4666995   | 1  | 0.21 | 0.72      | 0.73       |
| rs1344707   | 1  | 0.21 | 0.72      | 0.67       |
| rs6755404   | 1  | 0.21 | 0.72      | 0.69       |
| rs725617    | 1  | 0.21 | 0.57      | 0.76       |
| rs12693399  | 1  | 0.22 | 0.57      | 0.64       |
| rs1987025   | 1  | 0.23 | 0.44      | 0.47       |
| rs4666998   | 1  | 0.51 | 0.35      | 0.36       |
| rs2059924   | 1  | 0.51 | 0.35      | 0.36       |
| rs2059923   | 1  | 0.51 | 0.35      | 0.36       |
| rs11901504  | 1  | 0.5  | 0.35      | 0.36       |
| rs1366839   | 1  | 0.51 | 0.29      | 0.38       |
| rs6709418   | 1  | 0.27 | 0.22      | 0.28       |
| rs1429428   | 1  | 0.27 | 0.12      | 0.26       |
| rs6728764   | 1  | 0.38 | 0.075     | 0.11       |
| rs17431742  | 1  | 0.69 | 0.014     | 0.014      |
| novel290149 | 1  | 0.26 | 0.014     | 0.0086     |
| rs6749691   | 1  | 0.26 | 0.013     | 0.016      |
| rs7594906   | 1  | 0.69 | 0.013     | 0.019      |
| rs1366838   | 1  | 0.69 | 0.013     | 0.017      |
| novel318197 | 1  | 0.69 | 0.013     | 0.017      |
| rs1835172   | 1  | 0.69 | 0.013     | 0.017      |
| rs7558878   | 1  | 0.26 | 0.013     | 0.016      |
| rs13388087  | 1  | 0.69 | 0.013     | 0.014      |
| rs10931155  | 1  | 0.69 | 0.013     | 0.014      |
| novel314084 | 1  | 0.69 | 0.013     | 0.014      |
| rs1429427   | 1  | 0.69 | 0.013     | 0.010      |
| rs7584503   | 1  | 0.27 | 0.013     | 0.010      |
| rs13401381  | 1  | 0.69 | 0.013     | 0.0093     |
| rs10210216  | 1  | 0.69 | 0.013     | 0.0093     |
| rs1366840   | 1  | 0.69 | 0.013     | 0.0093     |
| rs7603001   | 1  | 0.68 | 0.013     | 0.0092     |
| rs11904676  | 1  | 0.27 | 0.011     | 0.010      |
| rs728534    | 1  | 0.36 | 0.0088    | 0.42       |
| rs6709436   | 1  | 0.27 | 0.0082    | 0.011      |

|             |      |      |          |          |
|-------------|------|------|----------|----------|
| rs1366844   | 1    | 0.27 | 0.0082   | 0.011    |
| rs11892843  | 1    | 0.27 | 0.0082   | 0.011    |
| novel308084 | 1    | 0.27 | 0.0082   | 0.010    |
| rs10206265  | 1    | 0.27 | 0.0082   | 0.010    |
| rs11899082  | 1    | 0.27 | 0.0082   | 0.010    |
| rs6718067   | 1    | 0.27 | 0.0082   | 0.010    |
| rs12693400  | 1    | 0.27 | 0.0082   | 0.0089   |
| rs13012514  | 1    | 0.25 | 0.0079   | 0.016    |
| rs34963004  | 1    | 0.27 | 0.0079   | 0.019    |
| rs35321501  | 1    | 0.27 | 0.0079   | 0.018    |
| rs7577581   | 1    | 0.27 | 0.0079   | 0.018    |
| rs7605689   | 1    | 0.27 | 0.0079   | 0.017    |
| rs7578316   | 1    | 0.27 | 0.0079   | 0.017    |
| rs16826219  | 1    | 0.27 | 0.0079   | 0.017    |
| rs12693394  | 1    | 0.27 | 0.0079   | 0.016    |
| rs13424507  | 1    | 0.27 | 0.0079   | 0.016    |
| rs13012893  | 1    | 0.27 | 0.0079   | 0.016    |
| rs10201360  | 1    | 0.27 | 0.0079   | 0.016    |
| rs7608386   | 1    | 0.27 | 0.0079   | 0.016    |
| rs11890843  | 1    | 0.27 | 0.0079   | 0.016    |
| rs6728615   | 1    | 0.27 | 0.0079   | 0.015    |
| rs10177035  | 1    | 0.27 | 0.0079   | 0.015    |
| rs6759491   | 1    | 0.27 | 0.0079   | 0.015    |
| rs6716151   | 1    | 0.27 | 0.0079   | 0.015    |
| rs6434102   | 1    | 0.27 | 0.0079   | 0.015    |
| rs7564941   | 1    | 0.27 | 0.0079   | 0.013    |
| rs13408744  | 1    | 0.26 | 0.0079   | 0.012    |
| rs12693396  | 1    | 0.27 | 0.0079   | 0.018    |
| rs6716235   | 1    | 0.27 | 0.0079   | 0.015    |
| rs7588907   | 1    | 0.27 | 0.0079   | 0.011    |
| rs13028349  | 1    | 0.27 | 0.0079   | 0.017    |
| rs1583048   | 1    | 0.36 | 3.60E-05 | 2.07E-05 |
| rs7593816   | 1    | 0.36 | 3.60E-05 | 1.70E-05 |
| rs62200788  | 1    | 0.35 | 2.23E-05 | 5.28E-05 |
| rs3931790   | 1    | 0.36 | 2.22E-05 | 3.78E-05 |
| rs17584976  | 0.96 | 0.65 | 0.046    | 2.19E-04 |
| rs4380187   | 0.95 | 0.55 | 0.066    | 3.43E-04 |
| rs1429421   | 0.95 | 0.44 | 0.058    | 0.059    |
| rs5836928   | 0.95 | 0.43 | 0.018    | 0.044    |
| rs6722992   | 0.95 | 0.43 | 0.014    | 0.013    |
| rs10931156  | 0.95 | 0.43 | 0.014    | 0.010    |
| rs4667000   | 0.95 | 0.43 | 0.014    | 0.0073   |
| rs6726421   | 0.95 | 0.43 | 0.012    | 0.010    |
| rs1366842   | 0.95 | 0.43 | 0.0082   | 0.0094   |

|            |      |      |        |          |
|------------|------|------|--------|----------|
| rs4667001  | 0.95 | 0.43 | 0.0078 | 0.012    |
| rs2170203  | 0.95 | 0.53 | 0.0048 | 0.0061   |
| rs13026742 | 0.95 | 0.52 | 0.0044 | 0.0068   |
| rs6745533  | 0.94 | 0.35 | 0.062  | 0.057    |
| rs7583540  | 0.94 | 0.35 | 0.060  | 0.067    |
| rs10931158 | 0.94 | 0.35 | 0.060  | 0.044    |
| rs13420259 | 0.94 | 0.39 | 0.052  | 0.081    |
| rs17510170 | 0.94 | 0.36 | 0.045  | 0.067    |
| rs12615985 | 0.94 | 0.4  | 0.017  | 0.018    |
| rs12476147 | 0.94 | 0.43 | 0.012  | 0.0073   |
| rs6751736  | 0.93 | 0.29 | 0.29   | 0.27     |
| rs12477430 | 0.93 | 0.29 | 0.28   | 0.21     |
| rs10931157 | 0.93 | 0.28 | 0.26   | 0.33     |
| rs1583049  | 0.93 | 0.3  | 0.25   | 0.20     |
| rs13417466 | 0.92 | 0.24 | 0.028  | 0.023    |
| rs6742299  | 0.92 | 0.24 | 0.025  | 0.023    |
| rs7582887  | 0.92 | 0.24 | 0.025  | 0.023    |
| rs7569699  | 0.92 | 0.24 | 0.025  | 0.023    |
| rs16826178 | 0.92 | 0.24 | 0.025  | 0.023    |
| rs10167859 | 0.92 | 0.24 | 0.025  | 0.023    |
| rs13001215 | 0.92 | 0.24 | 0.025  | 0.023    |
| rs6434100  | 0.92 | 0.24 | 0.025  | 0.023    |
| rs1480484  | 0.92 | 0.24 | 0.025  | 0.023    |
| rs1480485  | 0.92 | 0.24 | 0.025  | 0.023    |
| rs1480486  | 0.92 | 0.24 | 0.025  | 0.023    |
| rs10190062 | 0.92 | 0.24 | 0.025  | 0.023    |
| rs10206426 | 0.92 | 0.24 | 0.025  | 0.023    |
| rs1600578  | 0.92 | 0.23 | 0.025  | 0.023    |
| rs1480481  | 0.9  | 0.47 | 0.0029 | 0.0038   |
| rs4667010  | 0.89 | 0.36 | 0.019  | 0.092    |
| rs4667012  | 0.89 | 0.36 | 0.019  | 0.092    |
| rs1601071  | 0.89 | 0.36 | 0.019  | 0.020    |
| rs6738633  | 0.89 | 0.36 | 0.019  | 0.018    |
| rs10931160 | 0.89 | 0.36 | 0.018  | 0.016    |
| rs4017483  | 0.89 | 0.36 | 0.017  | 0.022    |
| rs4667014  | 0.89 | 0.36 | 0.017  | 0.018    |
| rs13392265 | 0.89 | 0.36 | 0.017  | 0.018    |
| rs10204328 | 0.88 | 0.38 | 0.024  | 0.0084   |
| rs7597593  | 0.88 | 0.32 | 0.011  | 5.91E-04 |
| rs10173509 | 0.85 | 0.2  | 0.029  | 0.011    |
| rs6747844  | 0.85 | 0.21 | 0.025  | 0.025    |
| rs13389241 | 0.85 | 0.21 | 0.025  | 0.025    |
| rs1383309  | 0.85 | 0.21 | 0.025  | 0.025    |
| rs7583953  | 0.85 | 0.21 | 0.025  | 0.025    |

|            |      |      |          |          |
|------------|------|------|----------|----------|
| rs1038197  | 0.85 | 0.2  | 0.011    | 0.011    |
| rs16826158 | 0.85 | 0.2  | 0.011    | 0.011    |
| rs4308093  | 0.85 | 0.2  | 0.011    | 0.011    |
| rs11892742 | 0.85 | 0.2  | 0.011    | 0.010    |
| rs10184629 | 0.85 | 0.2  | 0.011    | 0.0087   |
| rs2199883  | 0.85 | 0.21 | 0.0093   | 0.025    |
| rs6723680  | 0.84 | 0.2  | 0.011    | 0.010    |
| rs7588753  | 0.84 | 0.2  | 0.011    | 0.010    |
| rs6718759  | 0.84 | 0.2  | 0.011    | 0.010    |
| rs7557843  | 0.75 | 0.33 | 1.97E-04 | 1.32E-04 |
| rs62176172 | 0.75 | 0.33 | 1.97E-04 | 1.32E-04 |
| rs12613195 | 0.75 | 0.33 | 5.00E-05 | 2.12E-04 |
| rs2163065  | 0.73 | 0.3  | 0.10     | 0.068    |
| rs17584494 | 0.7  | 0.24 | 2.65E-05 | 2.63E-05 |
| rs62176239 | 0.7  | 0.24 | 2.59E-05 | 2.63E-05 |
| rs17584522 | 0.7  | 0.24 | 1.58E-05 | 2.63E-05 |
| rs10497655 | 0.68 | 0.26 | 2.08E-04 | 1.77E-04 |
| rs1978573  | 0.65 | 0.21 | 3.43E-04 | 2.21E-04 |

D' and  $r^2$  = LD pairwise with rs1344706. P = P-value derived from Imputation of fatSNP1 sample using either PLINK or Beagle.
